# Supplementary material
Source: publisher figshare collection journal article supplement (https://acs.figshare.com/ndownloader/files/21793251)
Supplement: Supplementary file 1 [file 21793251]

## 1 SUPPORTING INFORMATION

### 2 **Association of enzymatically and non-enzymatically functionalized** 3 **caseins analyzed by size-exclusion chromatography and light** 4 **scattering techniques**

5 Mariella Hannß<sup>†</sup>, Raffaele Andrea Abbate<sup>‡</sup>, Eva Mitzenheim<sup>†</sup>, Mahmoud Alkhalaf<sup>‡</sup>, Wendelin  
6 Böhm<sup>†</sup>, Albena Lederer<sup>‡</sup> and Thomas Henle<sup>†\*</sup>

7 <sup>†</sup>Chair of Food Chemistry, Technische Universität Dresden, 01062 Dresden, Germany

8 <sup>‡</sup>Leibniz-Institut für Polymerforschung Dresden e.V., Hohe Str. 6, 01069 Dresden, Germany and  
9 School of Science, Technische Universität Dresden, 01062 Dresden, Germany

10

**Quantitation of Maillard Reaction Products by High-Pressure Liquid Chromatography with Tandem Mass Spectrometric Detection (HPLC-MS/MS).** Protein-bound Maillard reaction products were quantitated in enzymatic hydrolyzed casein samples by HPLC-MS/MS with standard addition. Enzymatic hydrolysis and HPLC-MS/MS were performed according to Hellwig et al.<sup>1</sup> All samples were filtrated (0.45  $\mu$ m, regenerated cellulose) before injection. The added standard solutions contained the target analytes in the following concentrations: 1.0  $\mu$ g/mL N- $\epsilon$ -carboxyethyllysine (CEL), 2.0  $\mu$ g/mL formyllysine, 0.5  $\mu$ g/mL methylglyoxal-derived hydroimidazolone 1 (MG-H1), and 2.0  $\mu$ g/mL pyrroline 2.0  $\mu$ g/mL for control and glycated samples and 19.9  $\mu$ g/mL CEL, 0.4  $\mu$ g/mL formyllysine, 5.0  $\mu$ g/mL MG-H1, and 2.0  $\mu$ g/mL pyrroline for MGO-modified sample, respectively. N- $\epsilon$ -carboxymethyllysine (CML) was quantified after acid hydrolysis and reduction by HPLC-MS/MS with external calibration and an internal standard (D<sub>2</sub>-CML) according to Moeckel et al.<sup>2</sup>

#### **Lipid Extraction and Identification by Thin-layer Chromatography (TLC).**

Lipids were extracted from casein lyophilizates using the Folch method<sup>3,4</sup> and separated by TLC according to Helmerich & Koehler<sup>5</sup>. Therefore, 500  $\mu$ L ice-cold methanol followed by 1000  $\mu$ L ice-cold chloroform were added to 10 mg casein, vortex-homogenized for 30 s and incubated for 20 min at -20 °C. After centrifugation at 2.000 $\times$ g for 20 min, the supernatant was filtrated (0.45  $\mu$ m, regenerated cellulose) and an aliquot of 1000  $\mu$ L was evaporated under nitrogen stream. The dried lipid extracts were resolubilized in 200  $\mu$ L n-hexane:2-propanol (4:1, v/v). 10 mg of a freeze-dried sample of commercial butter milk was extracted analogously and solubilized in 500  $\mu$ L n-hexane:2-propanol (4:1, v/v). Soy lecithin, sunflower oil, oleic acid, and cholesterol

34 dissolved to 0.5 mg/mL in n-hexane:2-propanol (4:1, v/v), respectively, were used as standards for  
35 TLC. 12  $\mu$ L of sample extracts and 6  $\mu$ L of standards were applied band-wise (5 mm) onto a  
36 HPTLC plate (silica G 60, 200 $\times$ 100 $\times$ 0.25 mm, Merck) using a glass capillary (2  $\mu$ L) and  
37 developed with methyl acetate/chloroform/1-propanol/methanol/0.25% aqueous potassium  
38 chloride (25:25:25:10:9, v/v/v/v/v). Plate was dipped into an 3.3% (w/v) copper sulfate solution  
39 containing 14% (w/v) phosphoric acid, heated at 180 °C for 10 min and visualized afterward under  
40 white light.

**Table S1.** Concentrations of individual Maillard reaction products given in  $\mu\text{mol/g}$  protein (corresponding percentage of lysine/arginine modification in parentheses) of untreated casein (control), after glycation with lactose for 36 h (Lac-36) and 48 h (Lac-48) and upon modification with MGO as well as performance parameters of the LC MS/MS analysis. Values expressed as mean  $\pm$  standard deviation (n=2).

| Analyt                        | control                | Lac-36                     | Lac-48                     | MGO                      | LOD <sup>a</sup> | LOQ <sup>a</sup> |
|-------------------------------|------------------------|----------------------------|----------------------------|--------------------------|------------------|------------------|
| Amadori products <sup>b</sup> | 9.1 $\pm$ 0.2<br>(2.0) | 241.8 $\pm$ 1.3<br>(40.8)  | 245.6 $\pm$ 15.5<br>(42.2) | -                        | -                | -                |
| CML                           | 0.7 $\pm$ 0.0<br>(0.1) | 41.0 $\pm$ 1.5<br>(7.5)    | 47.5 $\pm$ 1.2<br>(8.7)    | -                        | 0.07             | 0.20             |
| pyrraline                     | tr                     | 3.3 $\pm$ 0.3<br>(0.6)     | 3.5 $\pm$ 0.1<br>(0.6)     | tr                       | 0.04             | 0.13             |
| CEL                           | n.d.                   | 0.31 $\pm$ 0.03<br>(< 0.1) | 0.35 $\pm$ 0.07<br>(< 0.1) | 24.8 $\pm$ 0.7<br>(4.4)  | 0.08             | 0.25             |
| formyline                     | n.d.                   | 0.19 $\pm$ 0.01<br>(< 0.1) | 0.18 $\pm$ 0.03<br>(< 0.1) | n.d.                     | 0.02             | 0.06             |
| MG-H1                         | n.d.                   | tr                         | 0.17 $\pm$ 0.03<br>(< 0.1) | 27.3 $\pm$ 3.0<br>(11.6) | 0.05             | 0.14             |

n.d., not detected (below LOD); tr, trace amounts (between LOD and LOQ)

<sup>a</sup> LOD and LOQ based on an amount of 3 mg protein per enzymatic hydrolysis

<sup>b</sup> data from Hannß et al.<sup>6</sup>

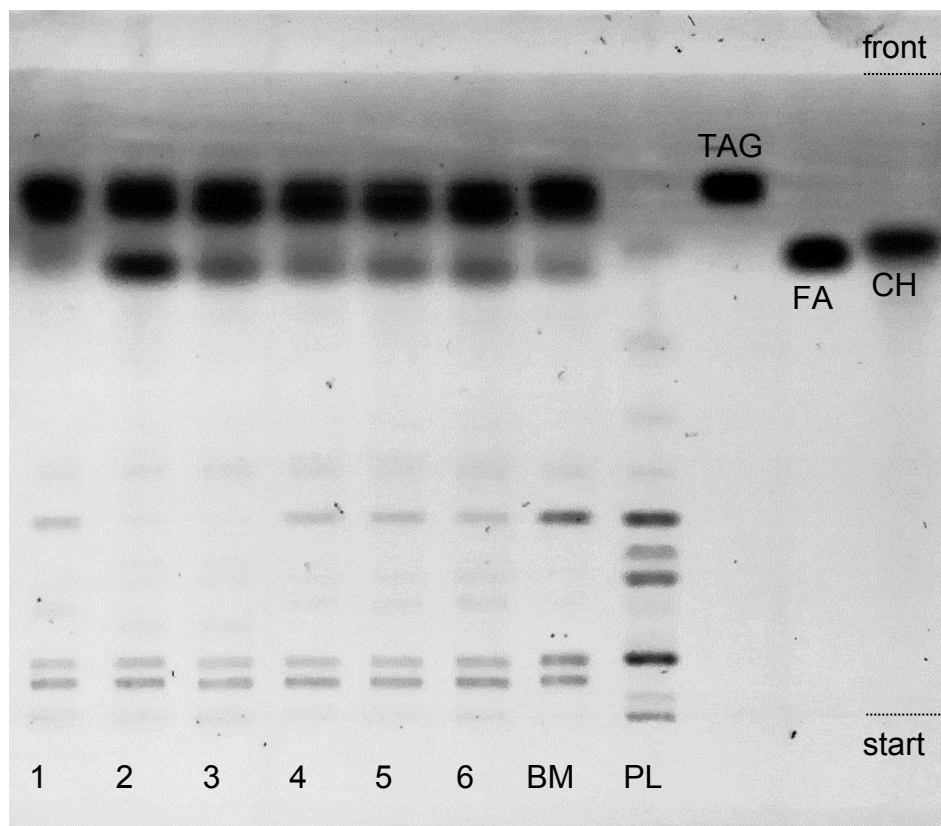

49

50 **Figure S1.** Separation of lipid components by TLC after FOLCH-extraction, developed with  
 51 methyl acetate/chloroform/1-propanol/methanol/0.25% potassium chloride (25:25:25:10:9,  
 52 v/v/v/v/v) and detected with 3.3% (w/v) copper sulfate in 14% (w/v) phosphoric acid; applied  
 53 casein samples: 1 = control, 2 = glycated with lactose (36 h), 3 = glycated with lactose (48 h),  
 54 4 = cross-linked with MGO, 5 = cross-linked with mTG, 6 = cross-linked with GTA, applied  
 55 standards: *BM* = lipids extracted from butter milk; *PL* = phospholipids from soy lecithin;  
 56 *TAG* = triacylglycerides from sunflower oil; *FA* = free fatty acids (oleic acid); *CH* = cholesterol;  
 57 Applied sample volume for 1-6: 12  $\mu$ L, standards: 6  $\mu$ L.

## REFERENCES

- (1) Hellwig, M.; Rückriemen, J.; Sandner, D.; Henle, T. Unique Pattern of Protein-Bound Maillard Reaction Products in Manuka (*Leptospermum Scoparium*) Honey. *J. Agric. Food Chem.* **2017**, 65 (17), 3532–3540. <https://doi.org/10.1021/acs.jafc.7b00797>.
- (2) Moeckel, U.; Duerasch, A.; Weiz, A.; Ruck, M.; Henle, T. Glycation Reactions of Casein Micelles. *J. Agric. Food Chem.* **2016**, 64 (14), 2953–2961. <https://doi.org/10.1021/acs.jafc.6b00472>.
- (3) Folch, J.; Lees, M.; Stanley, G. H. S. A Simple Method for the Isolation and Purification of Total Lipides from Animal Tissues. *J. Biol. Chem.* **1957**, 226 (1), 497–509.
- (4) Reis, A.; Rudnitskaya, A.; Blackburn, G. J.; Fauzi, N. M.; Pitt, A. R.; Spickett, C. M. A Comparison of Five Lipid Extraction Solvent Systems for Lipidomic Studies of Human LDL. *Journal of Lipid Research* **2013**, 54 (7), 1812–1824. <https://doi.org/10.1194/jlr.M034330>.
- (5) Helmerich, G.; Koehler, P. Comparison of Methods for the Quantitative Determination of Phospholipids in Lecithins and Flour Improvers. *J. Agric. Food Chem.* **2003**, 51 (23), 6645–6651. <https://doi.org/10.1021/jf0345088>.
- (6) Hannß, M.; Hubbe, N.; Henle, T. Acid-Induced Gelation of Caseins Glycated with Lactose: Impact of Maillard Reaction-Based Glycoconjugation and Protein Cross-Linking. *J. Agric. Food Chem.* **2018**, 66 (43), 11477–11485. <https://doi.org/10.1021/acs.jafc.8b04176>.
